# Supplementary material for: Molecular Imaging of Immune Cell Dynamics During De- and Remyelination in the Cuprizone Model of Multiple Sclerosis by [18F]DPA-714 PET and MRI
Source: PubMed Central journal article supplement — Theranostics. 2019 Feb 20;9(6):1523–37. doi: 10.7150/thno.32461 (PMC6485187; doi:10.7150/thno.32461), 2019-02-20
Supplement: thnov09p1523s1.pdf [file thnov09p1523s1.pdf]

**Supplementary material**

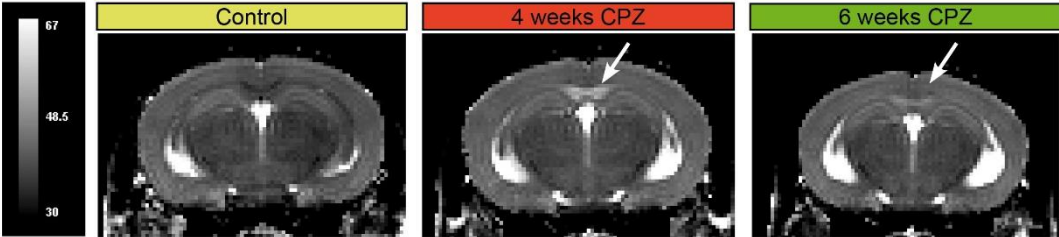

**Supplementary Figure 1:** Representative T<sub>2</sub> maps showed that control mice displayed a dark, hypointense CC, while mice receiving three and five weeks of CPZ display a bright, hyperintense contrast in the CC (white arrows), indicative of demyelination, neuroinflammation and associated edema. Next, T<sub>2</sub> from the CC was decreased after five weeks compared to three weeks, suggesting partial recovery from the CPZ-induced injury.

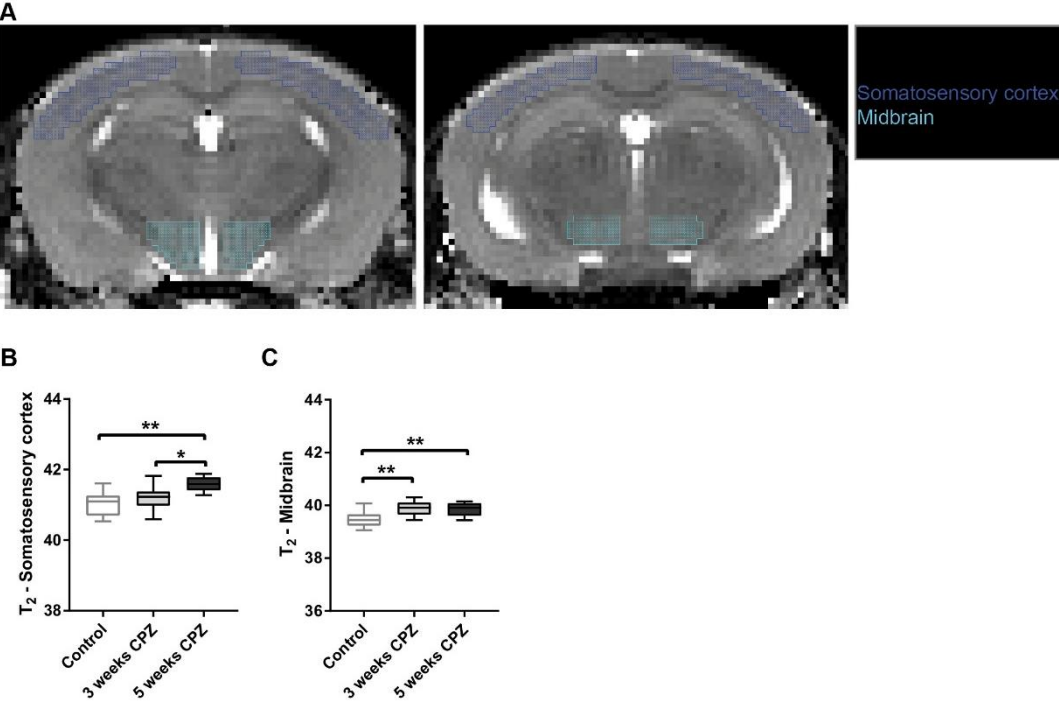

**Supplementary Figure 2 :** Quantification of mean T<sub>2</sub> values for control, CPZ-treated week 3, and CPZ-treated week 5 groups, in different brain regions (A). T<sub>2</sub> values were significantly increased in the (B) midbrain after three and five weeks of CPZ compared to control. T<sub>2</sub> values of the somatosensory cortex (C) were significantly increased only after five weeks of CPZ. (*One way ANOVA followed by Tukey multiple comparisons correction; \*p < 0.05, \*\*p<0.01, \*\*\*p < 0.001, \*\*\*\*p<0.0001*). Values are presented as Tukey box plots (mean ± SD). Abbreviations: CPZ, cuprizone.

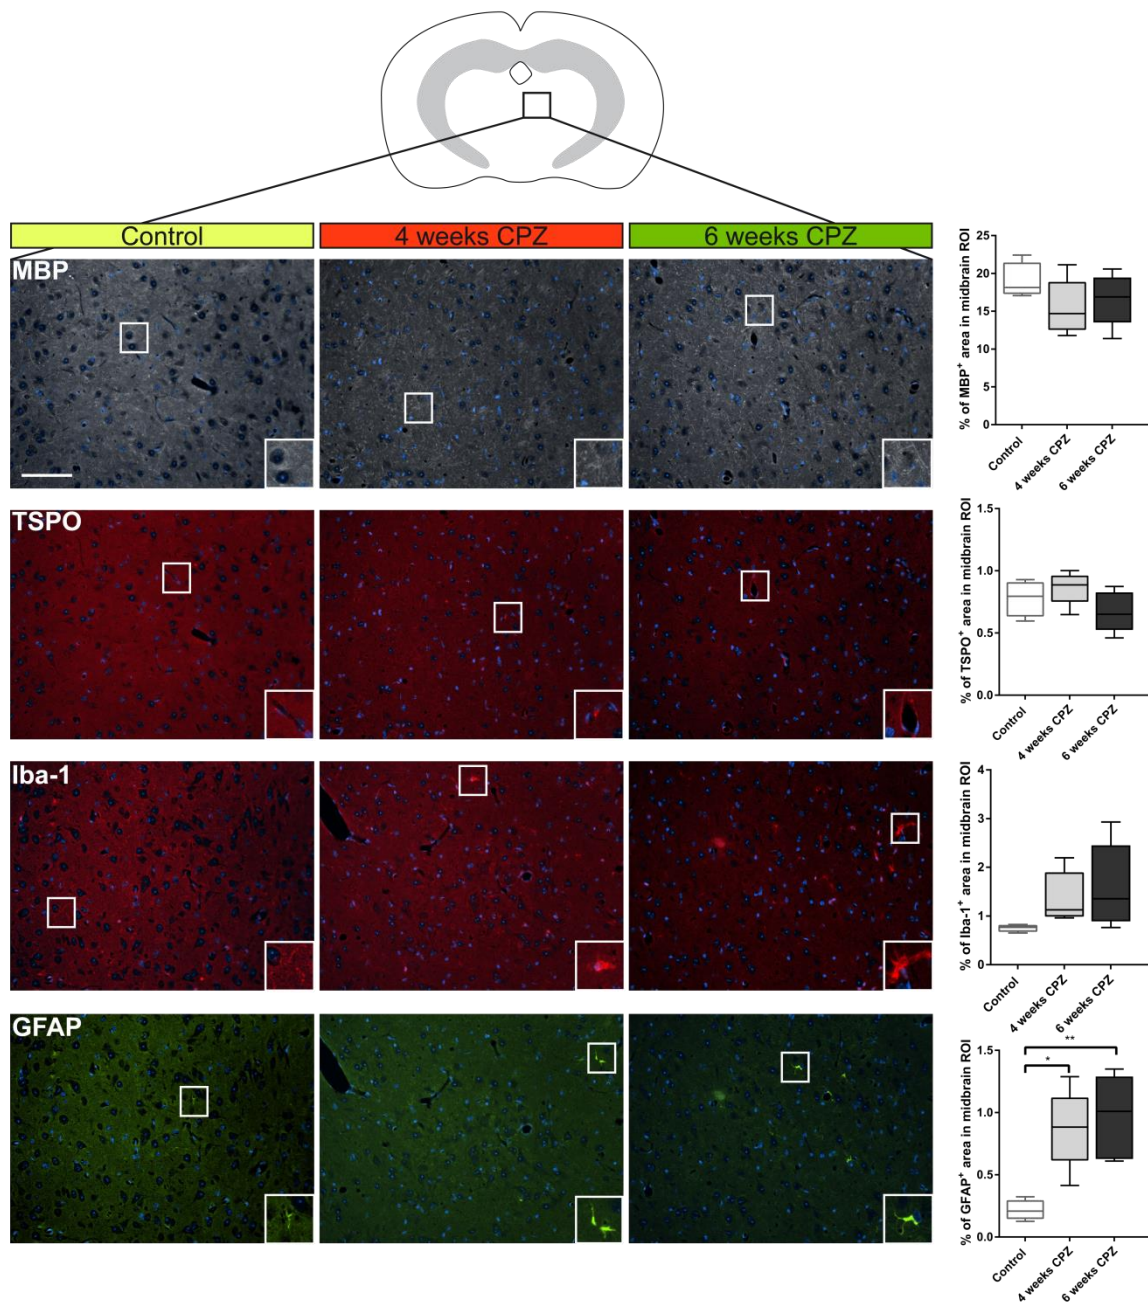

**Supplementary Figure 3:** Investigation of the midbrain as pseudo reference region in the CPZ model. Analysis of the area of immunofluorescence for MBP, TSPO and Iba-1 does not show significant changes after CPZ treatment. Only a few TSPO and Iba-1 positive cells were observed (high magnification insets). The GFAP positive area in the midbrain was significantly elevated 4 and 6 weeks after CPZ induction, albeit at low levels (*One way ANOVA followed by Tukey multiple comparisons correction*; \*p < 0.05, \*\*p < 0.01). Values are presented as Tukey box plots (mean ± SD).

**Step 1:**  
Co-registration of PET and CT using a landmark based approach

Outcome: PET and CT co-registered

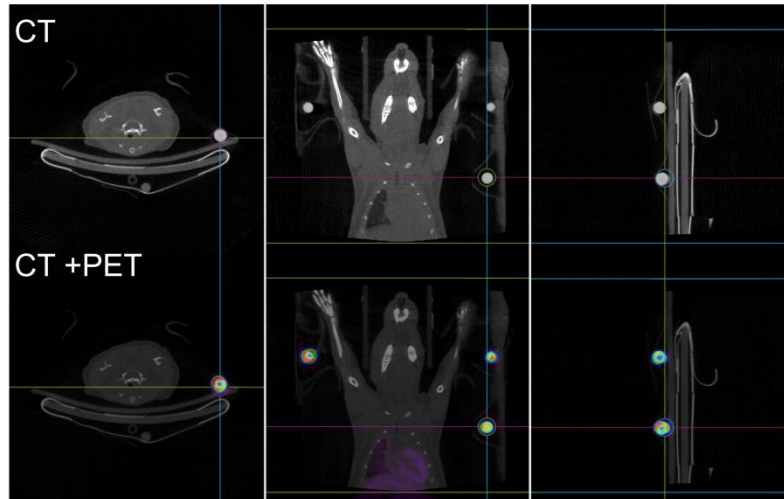

**Step 2:**  
Co-registration of CT with MR using skull contours

Outcome: CT and MR co-registered

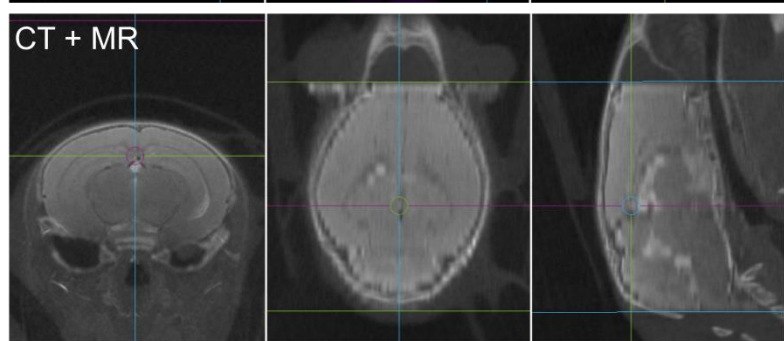

**Step 3:**  
Co-registration of CT-MR with atlas using skull contours

Outcome: CT, MR and atlas co-registered

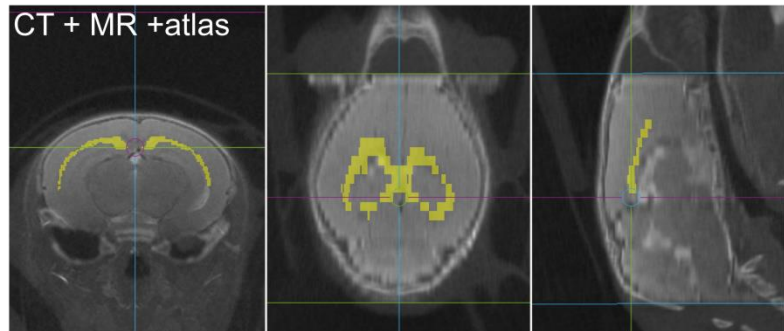

**Step 4:**  
Translation of CT image transformation parameters to PET

Outcome: CT, MR, atlas and PET co-registered

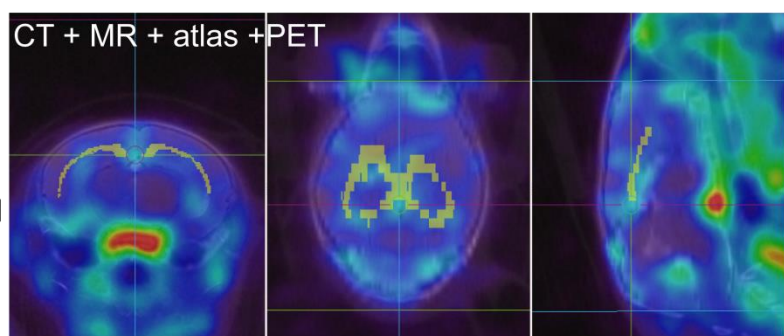

**Supplementary Figure 4:** Overview of the co-registration work flow. First PET and CT images were co-registered in three dimensions using spheres as landmarks. In a second and third step CT images and the brain atlas were co-registered to MR images using the skull contour as reference. In a last step CT image transformation parameters were transferred to PET images leading to co-registered PET/MR images.
